# Supplementary material for: Distinct features of SARS-CoV-2-specific IgA response in COVID-19 patients
Source: PubMed Central journal article supplement — Eur Respir J. 2020 Aug 27;56(2):2001526. doi: 10.1183/13993003.01526-2020 (PMC7236821; doi:10.1183/13993003.01526-2020), 2020-08-27
Supplement: ERJ-01526-2020.Shareable.pdf [file ERJ-01526-2020.Shareable.pdf]

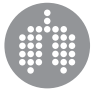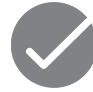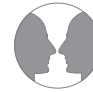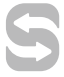

SHAREABLE PDF

# Distinct features of SARS-CoV-2-specific IgA response in COVID-19 patients

Hai-qiong Yu<sup>1,9</sup>, Bao-qing Sun<sup>2,9</sup>, Zhang-fu Fang<sup>1,2,3,9</sup>, Jin-cun Zhao<sup>2,9</sup>, Xiao-yu Liu<sup>1,9</sup>, Yi-min Li<sup>2,9</sup>, Xi-zhuo Sun<sup>3,9</sup>, Hong-feng Liang<sup>4,9</sup>, Bei Zhong<sup>5,9</sup>, Zhi-feng Huang<sup>2,9</sup>, Pei-yan Zheng<sup>2</sup>, Li-feng Tian<sup>6</sup>, Hui-Qi Qu<sup>6</sup>, De-chen Liu<sup>7</sup>, Er-yi Wang<sup>1,3</sup>, Xiao-jun Xiao<sup>1</sup>, Shi-yue Li<sup>2</sup>, Feng Ye<sup>2</sup>, Li Guan<sup>3</sup>, Dong-sheng Hu<sup>7</sup>, Hakon Hakonarson<sup>6,8,10</sup>, Zhi-gang Liu<sup>1,10</sup> and Nan-shan Zhong<sup>2,10</sup>

**Affiliations:** <sup>1</sup>State Key Laboratory of Respiratory Disease for Allergy at Shenzhen University, Shenzhen Key Laboratory of Allergy and Immunology, Shenzhen University School of Medicine, Shenzhen, China. <sup>2</sup>State Key Laboratory of Respiratory Disease, National Clinical Research Center for Respiratory Disease, Guangzhou Institute of Respiratory Health, First Affiliated Hospital of Guangzhou Medical University, Guangzhou, China. <sup>3</sup>Dept of Respiriology and Allergy, Third Affiliated Hospital of Shenzhen University, Shenzhen, China. <sup>4</sup>Yangjiang People's Hospital, Yangjiang, China. <sup>5</sup>Dept of Infectious Disease, The Sixth Affiliated Hospital of Guangzhou Medical University, Qingyuan People's Hospital, Qingyuan, China. <sup>6</sup>Center for Applied Genomics, The Children's Hospital of Philadelphia, Philadelphia, PA, USA. <sup>7</sup>Dept of Preventive Medicine, Shenzhen University Health Sciences Center, Shenzhen, China. <sup>8</sup>Divisions of Human Genetics and Pulmonary Medicine, Dept of Pediatrics, The Perelman School of Medicine, University of Pennsylvania, Philadelphia, PA, USA. <sup>9</sup>These authors contributed equally to this work. <sup>10</sup>Hakon Hakonarson, Zhi-gang Liu and Nan-shan Zhong are joint lead authors.

**Correspondence:** Nan-shan Zhong, State Key Laboratory of Respiratory Disease, Guangzhou Institute of Respiratory Health, The First Affiliated Hospital of Guangzhou Medical University, 151 Yanjiang Rd., Guangzhou (510120), China. E-mail: nanshan@vip.163.com

 @ERSpublications

**Humoral immune response to SARS-CoV-2 showed an early response of IgA, instead of IgM, in COVID-19 patients. As highlighted by this study, enhanced IgA responses observed in severe COVID-19 might confer damaging effects in severe COVID-19.** <https://bit.ly/3fA7c1I>

**Cite this article as:** Yu H-qiong, Sun B-qing, Fang Z-fu, *et al.* Distinct features of SARS-CoV-2-specific IgA response in COVID-19 patients. *Eur Respir J* 2020; 56: 2001526 [<https://doi.org/10.1183/13993003.01526-2020>].

This single-page version can be shared freely online.

*To the Editor:*

In comparison to severe acute respiratory syndrome coronavirus (SARS-CoV), SARS-CoV-2 appears to be more contagious [1], and coronavirus disease 2019 (COVID-19) patients demonstrate varied clinical manifestations distinct from those seen in patients with SARS-CoV and Middle East respiratory syndrome coronavirus infections [2]. Collective results from the clinical and epidemiological observations suggest a distinct viral–host interaction in COVID-19 patients. Profiling of the antibody response during SARS-CoV-2 infection may help improve our understanding of the viral–host interaction and the immunopathological mechanisms of the disease.
